# Supplementary material
Source: MDPI journal article supplement (https://www.mdpi.com/2076-0760/4/3/700)
Supplement: s2 [file s2]

## Sheet: Employment Policy Expenditure
	AUS ALMP	AUS UB	AUT ALMP	AUT UB	BEL ALMP	BEL UB	CAN ALMP	CAN UB	DNK ALMP	DNK UB	FIN ALMP	FIN UB	FRA ALMP	FRA UB	GER ALMP	GER UB	GRC ALMP	GRC UB	IRL ALMP	IRL UB	ITA ALMP	ITA UB	NLD ALMP	NLD UB	NZL ALMP	NZL UB	NOR ALMP	NOR UB	PRT ALMP	PRT UB	ESP ALMP	ESP UB	SWE ALMP	SWE UB	CHE ALMP	CHE UB	GBR ALMP	GBR UB	USA ALMP	USA UB
1990	0.0188406	0.157971	0.0777778	0.325926	0.140909	0.212121	0.0317073	0.229268	0.156944	0.561111	0.225	0.19375	0.0725	0.14375	0.1	0.160656	0.0208955	0.061194	0.0644444	0.182963	0.017037	0.0595506	0.162745	0.486275	0.09	0.235	0.148077	0.217308	0.0770833	0.05	0.0458333	0.177083	0.847059	0.470588	0.317797	0.275424	0.0347826	0.0971014	0.0303571	0.0839286
1991	0.0208333	0.164583	0.0793399	0.31736	0.1375	0.23125	0.0368932	0.218447	0.164557	0.54557	0.156061	0.254545	0.08	0.152941	0.170909	0.263636	0.0202703	0.0608108	0.0398649	0.175676	0.0222973	0.0682353	0.175	0.502083	0.0641509	0.170755	0.141818	0.212727	0.1	0.0761905	0.0386207	0.197241	0.7	0.506452	0.157068	0.356021	0.0197674	0.113953	0.0235294	0.0955882
1992	0.037037	0.15463	0.059375	0.35625	0.123944	0.226761	0.0348214	0.199107	0.19186	0.556977	0.121368	0.282051	0.0860215	0.154839	0.190909	0.221212	0.0167304	0.0454111	0.0467532	0.173377	0.0188312	0.0772727	0.185714	0.516327	0.082243	0.176636	0.147458	0.238983	0.119512	0.109756	0.0337423	0.193865	0.489286	0.473214	0.0856242	0.410095	0.0204082	0.118367	0.02	0.0773333
1993	0.0376147	0.149541	0.055	0.365	0.102326	0.211628	0.0359649	0.168421	0.155208	0.454167	0.0803681	0.266871	0.0933962	0.14434	0.148718	0.248718	0.00963701	0.038548	0.0525641	0.171154	0.0147436	0.0896907	0.169091	0.510909	0.0653061	0.163265	0.158333	0.243333	0.0854545	0.130909	0.0179104	0.173134	0.292308	0.297802	0.066718	0.400308	0.0166667	0.111765	0.0217391	0.0623188
1994	0.0428571	0.15102	0.0615385	0.389744	0.0989796	0.182653	0.0365385	0.143269	0.209091	0.451948	0.0771084	0.246988	0.0900901	0.127027	0.112941	0.232941	0.0129046	0.0408646	0.0664336	0.186713	0.0174825	0.082243	0.135484	0.483871	0.0690476	0.152381	0.209259	0.240741	0.0514706	0.123529	0.0150235	0.14554	0.282979	0.267021	0.0780107	0.329108	0.0172043	0.101075	0.0245902	0.0557377
1995	0.0588235	0.144706	0.0641026	0.371795	0.104124	0.17732	0.0357895	0.133684	0.228358	0.428358	0.0785714	0.222727	0.0971429	0.121905	0.118072	0.245783	0.0308676	0.0418917	0.0845528	0.198374	0.0219512	0.0589286	0.114085	0.4	0.0846154	0.173846	0.218367	0.220408	0.0513889	0.105556	0.017	0.12	0.232955	0.257955	0.097429	0.303112	0.0141176	0.0952941	0.0232143	0.0589286
1996	0.0376471	0.147059	0.0651163	0.339535	0.118947	0.175789	0.0260417	0.11875	0.231746	0.395238	0.0931507	0.217808	0.0972727	0.116364	0.121348	0.260674	0.0254998	0.0407997	0.0846154	0.184615	0.0290598	0.0589286	0.128125	0.514062	0.084127	0.18254	0.189583	0.185417	0.0541667	0.0986111	0.0157068	0.108901	0.205208	0.221875	0.120958	0.303629	0.0126582	0.0835443	0.0222222	0.0481481
1997	0.0258824	0.132941	0.0704545	0.302273	0.098913	0.170652	0.0274725	0.10989	0.298077	0.384615	0.0984127	0.215079	0.0945946	0.11982	0.0938144	0.252577	0.0204771	0.0419781	0.10202	0.172727	0.0393939	0.0535714	0.165455	0.536364	0.075	0.207353	0.179487	0.171795	0.0552239	0.0940299	0.0185393	0.103933	0.186869	0.19697	0.139845	0.297447	0.0132353	0.0691176	0.026	0.046
1998	0.0194805	0.137662	0.0711111	0.293333	0.108602	0.158065	0.0325301	0.113253	0.357143	0.35102	0.0877193	0.187719	0.0934579	0.121495	0.101053	0.238947	0.025	0.0339286	0.122368	0.182895	0.0631579	0.0495575	0.237209	0.551163	0.0571429	0.192208	0.2	0.158065	0.084	0.116	0.0314465	0.1	0.267073	0.202439	0.206711	0.317555	0.0131148	0.0655738	0.0288889	0.0533333
1999	0.0246377	0.134783	0.105128	0.317949	0.128235	0.16	0.0302632	0.101316	0.317308	0.303846	0.0892157	0.183333	0.100962	0.124038	0.124419	0.246512	0.02	0.0333333	0.155357	0.183929	0.0964286	0.0486239	0.282857	0.582857	0.0577465	0.207042	0.176667	0.153333	0.104545	0.140909	0.056391	0.106767	0.291045	0.229851	0.225191	0.328244	0.0135593	0.059322	0.0333333	0.05
2000	0.0253968	0.136508	0.105556	0.305556	0.137681	0.166667	0.0294118	0.102941	0.376744	0.348837	0.0765306	0.164286	0.113333	0.133333	0.12625	0.23625	0.0214286	0.0357143	0.159524	0.171429	0.133333	0.0534653	0.312903	0.567742	0.0596774	0.21129	0.153125	0.134375	0.12	0.16	0.0606838	0.113675	0.264286	0.230357	0.26178	0.314136	0.0185185	0.0555556	0.0325	0.07
2001	0.0235294	0.129412	0.119444	0.302778	0.143939	0.177273	0.0291667	0.111111	0.368889	0.344444	0.0747253	0.162637	0.118293	0.15	0.127848	0.241772	0.0233645	0.0336449	0.189744	0.164103	0.164103	0.0577778	0.384615	0.65	0.0581818	0.196364	0.152941	0.129412	0.126829	0.160976	0.0638095	0.128571	0.227586	0.187931	0.25933	0.29728	0.016	0.052	0.0276596	0.102128
2002	0.0265625	0.120313	0.0952381	0.259524	0.110667	0.181333	0.0246753	0.0974026	0.334783	0.41087	0.0736264	0.165934	0.108434	0.174699	0.117241	0.243678	0.0165049	0.0320388	0.148889	0.168889	0.155556	0.0623529	0.33871	0.558065	0.0566038	0.190566	0.154054	0.145946	0.0921569	0.152941	0.0561404	0.127193	0.201667	0.185	0.197425	0.317597	0.0156863	0.0490196	0.0224138	0.0862069
2003	0.0288136	0.118644	0.104651	0.260465	0.104878	0.184146	0.0236842	0.1	0.262963	0.359259	0.0833333	0.173333	0.0921348	0.18427	0.094898	0.230612	0.00927835	0.0381443	0.126087	0.176087	0.154348	0.0642857	0.235714	0.469048	0.0645833	0.16875	0.159524	0.17381	0.0765625	0.157812	0.054386	0.125439	0.134848	0.193939	0.167015	0.31017	0.012	0.046	0.0183333	0.0616667
2004	0.0314815	0.114815	0.086	0.222	0.0988095	0.179762	0.0236111	0.0930556	0.24	0.303636	0.0897727	0.177273	0.0784946	0.175269	0.0809524	0.218095	0.0133333	0.0390476	0.12	0.182222	0.12	0.07625	0.180392	0.415686	0.0707317	0.129268	0.148837	0.148837	0.0764706	0.155882	0.0577982	0.133945	0.116216	0.187838	0.173839	0.284981	0.012766	0.0382979	0.02	0.0490909
2005	0.032	0.11	0.0884615	0.236538	0.103571	0.179762	0.0235294	0.0897059	0.2625	0.270833	0.0869048	0.17381	0.0709677	0.164516	0.059292	0.175221	0.00606061	0.0414141	0.118182	0.172727	0.106818	0.0883117	0.162264	0.381132	0.0684211	0.113158	0.135556	0.113333	0.0649351	0.149351	0.0706522	0.154348	0.123684	0.168421	0.171395	0.263002	0.0104167	0.0375	0.0196078	0.0470588
2006	0.0291667	0.102083	0.1125	0.2375	0.109639	0.16988	0.0238095	0.0920635	0.271795	0.251282	0.0961039	0.168831	0.075	0.145652	0.0582524	0.163107	0.0168539	0.0438202	0.111111	0.173333	0.0933333	0.0970588	0.181395	0.395349	0.0641026	0.0871795	0.135294	0.0882353	0.0564103	0.138462	0.0776471	0.163529	0.142857	0.151429	0.169549	0.247542	0.00740741	0.0333333	0.0217391	0.0521739
2007	0.0318182	0.0931818	0.115909	0.229545	0.130667	0.169333	0.025	0.0916667	0.265789	0.189474	0.102899	0.152174	0.0845238	0.142857	0.054023	0.141379	0.0180723	0.0409639	0.110638	0.180851	0.0787234	0.0983607	0.2	0.391667	0.0621622	0.0621622	0.176	0.084	0.045679	0.117284	0.0807229	0.168675	0.132787	0.121311	0.180328	0.22541	0.00754717	0.0301887	0.0217391	0.0652174
2008	0.0404762	0.107143	0.134211	0.252632	0.152857	0.18	0.0245902	0.104918	0.348571	0.365714	0.104688	0.148437	0.0820513	0.148718	0.068	0.14	0.0181818	0.061039	0.090625	0.2	0.059375	0.10597	0.232258	0.416129	0.0571429	0.0642857	0.157692	0.0615385	0.0532468	0.116883	0.060177	0.161062	0.104839	0.0935484	0.166925	0.182453	0.00701754	0.0350877	0.0241379	0.15
2009	0.0267857	0.0964286	0.1375	0.270833	0.149367	0.203797	0.0253012	0.114458	0.24	0.235	0.0914634	0.180488	0.0768421	0.149474	0.0807692	0.189744	0.0231579	0.0736842	0.0575	0.210833	0.03	0.164103	0.216216	0.456757	0.0393443	0.0770492	0.15	0.125	0.065625	0.125	0.0388889	0.163333	0.0807229	0.109639	0.127027	0.245946	0.00526316	0.0421053	0.0129032	0.11828
2010	0.0269231	0.0961538	0.15	0.279545	0.150602	0.184337	0.02375	0.09875	0.212	0.177333	0.103571	0.17619	0.085567	0.148454	0.0788732	0.178873	0.0174603	0.0579365	0.0561151	0.210791	0.0230216	0.160714	0.175556	0.388889	0.0323077	0.0876923	0.141667	0.133333	0.0527273	0.116364	0.0383085	0.154726	0.0930233	0.0930233	0.113333	0.173333		0.0384615	0.0104167	0.0802083

## Sheet: Capital flow
Country Code	AUS	AUT	BEL	CAN	CHE	DEU	DNK	ESP	FIN	FRA	GBR	GRC	IRL	ITA	JPN	NLD	NOR	NZL	PRT	SWE	USA
1985	46.93	57.68	86.08	67.48	74.14	30.2	64.86	28.97	46.22	37.84	55.56	53.86	93.34	33.58	14.43	84.17	59.86	65.68	57.36	49.29	24.11
1986	48.78	54.73	85.79	67.41	73.28	28.92	62.83	62.83	44.23	32.24	53.58	55.03	91.51	32.26	12.7	81.16	60.57	62.61	48.82	48.32	26
1987	53.34	54.5	85.3	67.8	73.88	29.31	61.69	30.41	46.94	31.16	54.12	54.48	91.61	31.2	14.34	80.39	58.57	63.04	47.1	47.67	26.82
1988	61.28	55.95	87	67.8	73.55	29.75	63.7	32.04	48.06	31.92	53.75	53.08	92.86	33.01	17.62	82.1	60.75	61.8	46.86	48.94	28.69
1989	59.95	62.4	89.23	67.31	78.51	32.56	68.69	36.51	52.08	35.88	55.51	54.05	93.72	39.34	21.95	85.96	64.48	60.97	48.1	57.63	30.87
1990	62.38	63.7	88.74	67.28	77.96	34.15	69.23	40.8	56.19	38.94	55.84	46.81	92.6	43.25	25.43	85.53	65.98	63.05	47	61.75	29.73
1991	61.01	64.09	89.07	66.17	77.28	35.39	74.26	45.47	58.34	42.76	54.65	46.92	92.81	45.12	25.22	85.77	65.8	67.8	45.09	63.49	29.16
1992	59.58	58.7	88.85	66.49	76.19	33.94	74.39	48.43	61.06	44.68	53.23	47.74	93.03	46.42	23.85	85.01	61.13	68.49	43.14	63.33	27.25
1993	60.26	58.62	89.26	69.65	76.99	33.44	75.8	50.71	66.76	46.46	55.41	48.17	93.4	54.61	21.75	85.06	62.4	70.22	48.71	70.91	28.05
1994	64.52	60.55	89.96	72.55	77.56	34.95	76.28	52.73	67.83	37.83	55.35	47.13	94.25	54.64	21.48	84.66	65.47	72.58	52.45	73.2	29.68
1995	64.77	62.89	89.66	75.8	76.7	35.65	77.28	54.1	66.14	40.68	56.54	47.36	94.91	56.71	21.71	85.03	65.95	73.04	54.74	77.18	32.88
1996	65.5	63.38	90.2	75.47	77.74	36.89	78.07	56.14	66.53	40.94	57.21	48.12	94.91	56.33	16.76	87.18	67.35	73.11	62.14	76.45	33.97
1997	63.67	68.6	91.63	77.14	81.17	40.93	78.39	60.03	68.82	44.42	56.51	48.9	94.85	60.72	17.76	88.61	69.16	72.88	65.44	79.51	36.11
1998	64.05	70.9	92.68	78.78	83.84	44.29	78.09	62.75	72.83	47.24	56.91	49.94	96.79	63.59	17.75	90.45	71.6	74.27	69.06	80.38	36.92
1999	65.69	74.85	92.92	79.48	85.3	47.17	77.94	64.5	74.67	46.92	58.24	53.09	96.79	62.55	15.87	91.24	69.2	75.74	68.27	81.71	38.25
2000	65.61	79.3	94.29	79.11	88.96	53.97	85.23	69.2	81.22	50.12	61.26	58.24	98.03	64.25	16.11	93.67	74.41	78.94	74.27	85.17	38.77
2001	67.03	80.81	94.56	77.43	88.47	53.35	85.14	71.23	80.12	49.91	60.78	57.5	98.52	63.19	16.92	92.48	74.19	77.39	76.85	85.22	35.28
2002	67.69	82.09	94.34	76.41	86.27	53.96	83.98	70.3	79.41	48.37	59.22	55.32	98.09	63.65	17.42	91.77	72.59	77.34	73.7	83.24	33.93
2003	68.6	81.54	93.37	73.82	86.78	54.14	82.03	68.74	80.01	49.32	58.98	59.36	97.44	63.18	17.36	92.11	73.99	75.54	73.99	82.23	35.77
2004	68.77	83.48	94.61	73.57	87.7	54.72	81.69	70.3	79.62	51.45	59.31	60.55	97.44	62.51	18.36	93.27	76.86	76.54	76.03	85.25	37.89
2005	70.07	86.04	95.65	74.95	89.87	57.16	86.72	72.16	81.67	55.14	60.78	62.5	96.91	63.76	19.91	94.82	78.67	76.37	77.41	86.65	40.08
2006	72.62	88.07	96.38	75.07	91.51	61.03	88.31	76.65	84.62	58.33	63.24	66.7	96.97	67.58	23.3	95.52	81.49	77.86	81.94	88.54	43.88
2007	74.5	90.4	97.14	76.28	93.19	63.16	89.34	79	85.72	59.64	62.66	71.07	97.69	70.22	25.9	96.28	83.04	77.65	82.97	89.57	45.73
2008	71.27	88.74	97.35	75.16	92.21	61.31	88.74	77.54	85.49	57.77	62.67	70.56	97.66	69.71	26.13	95.47	81.96	77.64	82.83	89.19	42.63
2009	73.47	87.64	95.73	72.87	90.62	56.66	85.65	74.78	77.93	55.13	61.62	66.35	98.66	65.6	23.74	94	78.78	73.5	80.95	88.19	39.78
2010	72.67	88.99	95.55	73.09	90.99	59.68	85.26	75.45	82.17	54.83	62.2	66.18	99.09	66.28	24.13	95.34	80.09	75.18	82.75	88.56	40.26
